# Supplementary material for: Effect of initial support particle size of MnOx/TiO2 catalysts in the selective catalytic reduction of NO with NH3
Source: Royal Society of Chemistry journal article supplement (doi:10.1039/c8ra10077b), 2019-01-01
Supplement: c8ra10077b1.pdf [file c8ra10077b1.pdf]

**Manuscript submitted for publication in *RSC Advances***

## **Supplementary Information**

### **Effect of initial support particle size over $\text{MnO}_x/\text{TiO}_2$ catalysts in selective catalytic reduction of NO with $\text{NH}_3$**

Yang Yang<sup>1,2</sup>, Zhun Hu<sup>1\*</sup>, Rongli Mi<sup>1</sup>, Dan Li<sup>1</sup>, Xiang Yong<sup>1</sup>, Huie Yang<sup>2</sup>, Kunfeng Liu<sup>2</sup>

<sup>1</sup> Institute of Industrial Catalysis, School of Chemical Engineering and Technology, Xi'an Jiaotong University, Xi'an Shaanxi 710049, China.

<sup>2</sup> Sinochem Modern Environmental Protection Chemicals (Xi'an) Co. LTD. Xi'an Shaanxi 710201, China

---

\* Corresponding author. Tel/Fax: +86-29-82663189.

E-mail address: [huzhun@mail.xjtu.edu.cn](mailto:huzhun@mail.xjtu.edu.cn);

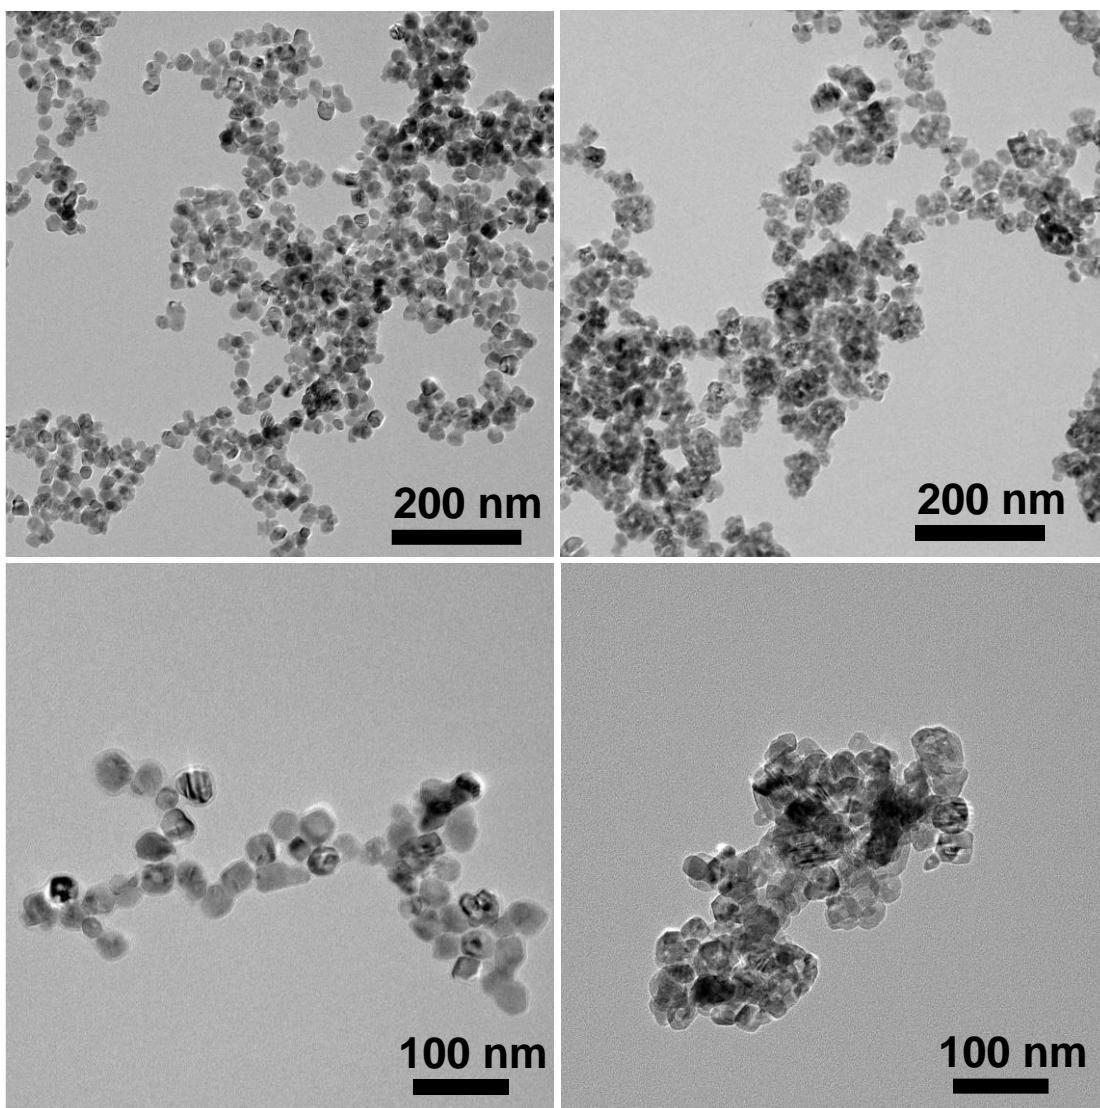

Figure S1. TEM images of various MnO<sub>x</sub>/TiO<sub>2</sub>(n) catalysts of n = 5-10 (A), 10-25 (B), 40 (C) and 60 (D).

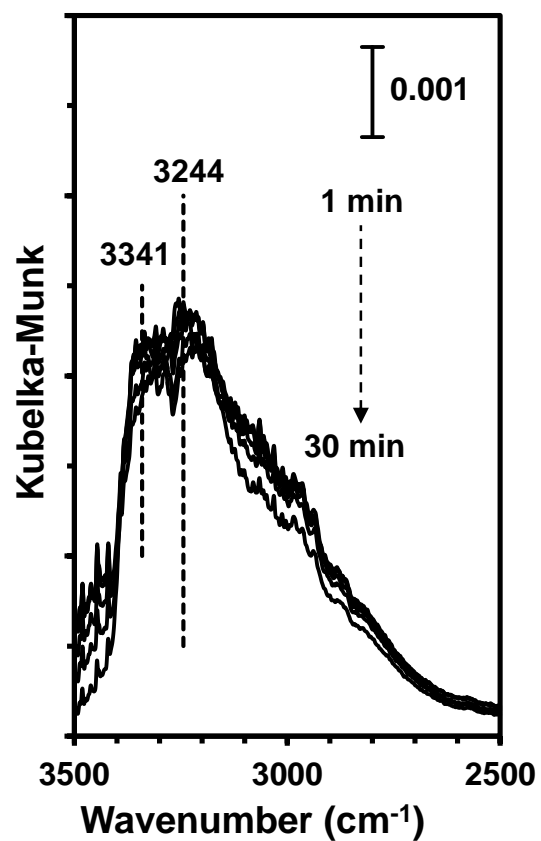

Figure S2. DRIFT spectra of MnO<sub>x</sub>/TiO<sub>2</sub>(10-25) pretreated by exposure to 500 ppm NH<sub>3</sub> + N<sub>2</sub> followed by exposure to 500 ppm NO + 5% O<sub>2</sub> + N<sub>2</sub> at 100 °C for various times.
